# Supplementary material
Source: HighWire-hosted journal article supplement (https://bmjopen.bmj.com/content/12/5/e060230)
Supplement: inline-supplementary-material-1 [file inline-supplementary-material-1.pdf]

**Supplementary Table 1: Programme impact pathway**

|                                                          | Inputs                                                                                                                                                                                                                                                                                                                                                             | Process                                                                                                                                                                                                                                                                                                                                                              | Outputs                                                                                                                                                                                                                                                                                               | Outcome                                                                                                                                                                                                                                                                                                                                   |                                                                                                                                                                                                                        |                                                                 |
|----------------------------------------------------------|--------------------------------------------------------------------------------------------------------------------------------------------------------------------------------------------------------------------------------------------------------------------------------------------------------------------------------------------------------------------|----------------------------------------------------------------------------------------------------------------------------------------------------------------------------------------------------------------------------------------------------------------------------------------------------------------------------------------------------------------------|-------------------------------------------------------------------------------------------------------------------------------------------------------------------------------------------------------------------------------------------------------------------------------------------------------|-------------------------------------------------------------------------------------------------------------------------------------------------------------------------------------------------------------------------------------------------------------------------------------------------------------------------------------------|------------------------------------------------------------------------------------------------------------------------------------------------------------------------------------------------------------------------|-----------------------------------------------------------------|
|                                                          |                                                                                                                                                                                                                                                                                                                                                                    |                                                                                                                                                                                                                                                                                                                                                                      |                                                                                                                                                                                                                                                                                                       | Short-term                                                                                                                                                                                                                                                                                                                                | Medium-term                                                                                                                                                                                                            | Long-term                                                       |
| <b>Product development and supply related activities</b> | <ul style="list-style-type: none"> <li>▪ Development of a strategy to promote MMS</li> <li>▪ Adequate funding secured</li> <li>▪ Identification of key stakeholders and development of partnership</li> <li>▪ Adequate and timely supply of raw materials for product development</li> <li>▪ Supply chain identified and finalized</li> </ul>                      | <ul style="list-style-type: none"> <li>▪ Several national and international workshops were organized involving key stakeholders and development partners</li> <li>▪ Regular update meetings organized among different stakeholders</li> <li>▪ Ensured policy environment and support of stakeholders,</li> <li>▪ Taking approval from the government body</li> </ul> | <ul style="list-style-type: none"> <li>▪ Government-approved product along with promotional activities</li> <li>▪ Well-developed program impact pathway available</li> <li>▪ Stakeholders are regularly updated regarding program progress</li> </ul>                                                 | <ul style="list-style-type: none"> <li>▪ Product is available at production and ready to be reached to the supply chain</li> <li>▪ Program impact pathway is followed as per plan</li> <li>▪ Problems in product development or supply related are identified through regular updates/meetings with stakeholders and mitigated</li> </ul> | <ul style="list-style-type: none"> <li>▪ Product is available at all tiers of supply chains as per plan and consumer demand</li> <li>▪ Product is made available to all pregnant mothers in the target area</li> </ul> | Reduction of % of LBW in target areas compared to control areas |
| <b>MMS Delivery related activities</b>                   | <ul style="list-style-type: none"> <li>▪ Identification of different tiers of service providers</li> <li>▪ Selection and finalization of areas that will receive product considering priority</li> <li>▪ Support to upgrade infrastructure (if needed)</li> <li>▪ Identification of other pharmacies/service providers as the leverage point to promote</li> </ul> | <ul style="list-style-type: none"> <li>▪ Finalizing agreement with different tiers of service providers</li> <li>▪ Development of service standards and guidelines</li> </ul>                                                                                                                                                                                        | <ul style="list-style-type: none"> <li>▪ # of different tiers of service providers trained/reached</li> <li>▪ # of different tiers of service providers with adequate awareness regarding MMS</li> <li>▪ # of service providers with adequate logistics to provide the service/counselling</li> </ul> | <ul style="list-style-type: none"> <li>▪ Well trained service providers with adequate knowledge and training</li> <li>▪ Service providers operate the following guideline</li> </ul>                                                                                                                                                      | <ul style="list-style-type: none"> <li>▪ Timely access to MMS</li> <li>▪ Improved quality-adjusted coverage of MMS</li> </ul>                                                                                          |                                                                 |

|                                   | MMS (Domino effect!)                                                                                                                                                                                                                                                                                                                                        |                                                                                                                                                                                                                                                                                                                                                                                                                                         |                                                                                                                                                                                                                                                                                                                                                                                                                                                                                                                                                                                                         |                                                                                                                                                                                                                               |                                                                                                           |
|-----------------------------------|-------------------------------------------------------------------------------------------------------------------------------------------------------------------------------------------------------------------------------------------------------------------------------------------------------------------------------------------------------------|-----------------------------------------------------------------------------------------------------------------------------------------------------------------------------------------------------------------------------------------------------------------------------------------------------------------------------------------------------------------------------------------------------------------------------------------|---------------------------------------------------------------------------------------------------------------------------------------------------------------------------------------------------------------------------------------------------------------------------------------------------------------------------------------------------------------------------------------------------------------------------------------------------------------------------------------------------------------------------------------------------------------------------------------------------------|-------------------------------------------------------------------------------------------------------------------------------------------------------------------------------------------------------------------------------|-----------------------------------------------------------------------------------------------------------|
| <b>Demand Creation Activities</b> | <ul style="list-style-type: none"> <li>▪ Business to Business (B2B) – training and seminar with network providers and launch several above-the-line (ATL) and below-the-line (BTL) promotional activities</li> <li>▪ Business to Consumers (B2C) – develop and air TVC/RDC and implement different ATL and BTL promotional campaigns/activities.</li> </ul> | <ul style="list-style-type: none"> <li>▪ Development of training manuals and materials</li> <li>▪ Development of different promotional activities with field testing</li> <li>▪ Development of BCC materials with field testing</li> <li>▪ Ongoing training and refresher training for different tiers of service providers</li> <li>▪ Ongoing promotional activities in the community to promote MMS among the target group</li> </ul> | <ul style="list-style-type: none"> <li>▪ # of training materials developed</li> <li>▪ # of promotional activities performed in the community</li> <li>▪ # of promotional activities performed through media</li> <li>▪ # of training workshop/seminar conducted</li> <li>▪ # of different tiers of service providers trained/reached</li> <li>▪ # of different tiers of service providers agreed to prescribe MMS</li> <li>▪ # target mothers reached through different promotional activities</li> <li>▪ # target mothers know about BSP/GSP/PSP</li> <li>▪ # target mothers know about MMS</li> </ul> | <ul style="list-style-type: none"> <li>▪ Sufficient awareness was created at the community level</li> <li>▪ Changes in knowledge (what is MMS, what does MMS do, how many to consume etc.) of the pregnant mothers</li> </ul> | <ul style="list-style-type: none"> <li>▪ Increase in MMS sale</li> <li>▪ Improved usage of MMS</li> </ul> |

Supplementary Table 2: Process evaluation indicators

| Dimension of implementation   | Purpose                                                                      | Indicators (quantitative)                                                                                                                                                                                                                                                                                                                                                                                                                                                                                                                                                                                                                                                                                                                                                                                                                                                                                                                                                                                                                                                                                                                                                                                                                                                                               |
|-------------------------------|------------------------------------------------------------------------------|---------------------------------------------------------------------------------------------------------------------------------------------------------------------------------------------------------------------------------------------------------------------------------------------------------------------------------------------------------------------------------------------------------------------------------------------------------------------------------------------------------------------------------------------------------------------------------------------------------------------------------------------------------------------------------------------------------------------------------------------------------------------------------------------------------------------------------------------------------------------------------------------------------------------------------------------------------------------------------------------------------------------------------------------------------------------------------------------------------------------------------------------------------------------------------------------------------------------------------------------------------------------------------------------------------|
| <b>Implementation process</b> | the structures, resources, and mechanisms through which delivery is achieved | <ul style="list-style-type: none"> <li>▪ # of MMS tablets received as per agreement</li> <li>▪ # of MMS tablets dispatched from SMC warehouse to 12 Area offices</li> <li>▪ # of MMS tablets distributes from area office to Star network pharmacies/other outlets (area wise)</li> <li>▪ # of star providers / other pharmacies have MMS tablets (as planned)</li> <li>▪ Monthly sales report disaggregated by locations and outlets</li> <li>▪ # of MMS tablets repeat sales through star providers / other pharmacies</li> </ul> <p><b>Viability of the business model</b></p> <p><u>Sales:</u></p> <ul style="list-style-type: none"> <li>▪ Sales per blue star outlet per month</li> <li>▪ Sales per pink star outlet per month</li> <li>▪ Sales per green star outlet per month</li> <li>▪ Overall Sales per month</li> </ul> <p><u>Reach:</u></p> <ul style="list-style-type: none"> <li>▪ # of BlueStar outlets stocking MMS</li> <li>▪ # of green star outlets stocking MMS</li> <li>▪ # of pink star outlets stocking/prescribing MMS</li> </ul> <p><u>Supply Chain Efficiency:</u></p> <ul style="list-style-type: none"> <li>▪ Perfect Order rate (how many orders shipped without incident like damage/delayed) - SMC to pharmacy</li> <li>▪ Perfect Order rate - Renata to SMC</li> </ul> |
| <b>Fidelity (quality)</b>     | the consistency of what is implemented with the planned intervention         | <ul style="list-style-type: none"> <li>▪ # of training conducted to BSPs, GSPs &amp; PSPs on MMS (monthly) after product launching</li> <li>▪ # of District where training program on MMS for BSPs completed</li> <li>▪ # of providers reached through field visits</li> <li>▪ # of regional Seminar organized with OBGYN</li> <li>▪ # of meeting/visit organized in Upazila Health Complex</li> <li>▪ # of Somabesh (courtyard meeting) organized with pregnant mother (10 PW per Somabesh)</li> <li>▪ of promotional materials developed for different tiers of service providers</li> <li>▪ # of a TV Talk show on MMS and ANC</li> <li>▪ Digital interface established</li> <li>▪ # of repeat purchase tracked of MMS tablet by pregnant mother</li> <li>▪ # of the interactive message provided to the pregnant mother</li> </ul>                                                                                                                                                                                                                                                                                                                                                                                                                                                                  |

|                                             |                                                                                            |                                                                                                                                                                                                                                                                                                                                                                                                                                                                                                                                                                     |
|---------------------------------------------|--------------------------------------------------------------------------------------------|---------------------------------------------------------------------------------------------------------------------------------------------------------------------------------------------------------------------------------------------------------------------------------------------------------------------------------------------------------------------------------------------------------------------------------------------------------------------------------------------------------------------------------------------------------------------|
| <b>Adaptations</b>                          | alterations made to intervention to achieve a better contextual fit                        | <ul style="list-style-type: none"> <li>▪ If any changes were made to the BCC materials</li> <li>▪ If any changes were made to the training materials</li> <li>▪ If any changes were made to the timing/duration of counselling sessions</li> <li>▪ Any other changes made related to the intervention</li> </ul>                                                                                                                                                                                                                                                    |
| <b>Dose delivered</b>                       | amount or number of intended units of each intervention or component delivered or provided | <ul style="list-style-type: none"> <li>▪ # of training conducted to BSPs, GSPs &amp; PSPs on MMS (monthly)</li> <li>▪ # of Somabesh (courtyard meeting) organized with pregnant mother (10 PW per Somabesh)</li> <li>▪ # of a TV Talk show on MMS and ANC</li> </ul>                                                                                                                                                                                                                                                                                                |
| <b>Reach</b>                                | the extent to which a target audience comes into contact with the intervention             | <ul style="list-style-type: none"> <li>▪ # of pregnant mother reached</li> <li>▪ # of family members (husband, mother-in-law, etc.) reached</li> <li>▪ # of community key members reached (social/political/religious leaders, teachers, etc.)</li> <li>▪ MMS intake adherence among women during pregnancy</li> <li>▪ % of pregnant women who heard about MMS</li> <li>▪ Contact Coverage (proportion of mothers going to BSP/GSP/PSP)</li> <li>▪ Quality-adjusted Coverage (proportion of mothers receiving service according to recommended standard)</li> </ul> |
| <b>Dimension of Mechanisms of impact</b>    | Purpose                                                                                    | Indicators (qualitative)                                                                                                                                                                                                                                                                                                                                                                                                                                                                                                                                            |
| <b>Participant responses</b>                | how participants interact with the activities related to the MMS intervention              | Target participant's perception, knowledge, attitude, and practice regarding the MMS product                                                                                                                                                                                                                                                                                                                                                                                                                                                                        |
| <b>Mediators</b>                            | the process through which intervention and outcome are related                             | <ul style="list-style-type: none"> <li>▪ National policy/guideline in place</li> <li>▪ Work plan exists for timely procurement of supplements</li> <li>▪ The distribution system in place</li> <li>▪ Quality assurance plan in place</li> <li>▪ Behaviour change intervention strategy exists focused on supporting programme participants and programme advocacy</li> <li>▪ Adequate storage of MMN supplements at warehouse and distribution sites</li> </ul>                                                                                                     |
| <b>Unintended pathways and consequences</b> | The ways the intervention might be affecting the outcome indirectly and its                | # of pharmacies (other than BSP/GSP) selling the MMS product (spillover effect)                                                                                                                                                                                                                                                                                                                                                                                                                                                                                     |

|                              | impact                                                                                     |                                                                                                                                                                                                                                          |
|------------------------------|--------------------------------------------------------------------------------------------|------------------------------------------------------------------------------------------------------------------------------------------------------------------------------------------------------------------------------------------|
| <b>Dimension of Context</b>  | Purpose                                                                                    | Indicators                                                                                                                                                                                                                               |
| <b>Contextual moderators</b> | may include anything external to the intervention which impedes or strengthens its effects | <ul style="list-style-type: none"><li>▪ How ongoing COVID-19 pandemic affects the implementation of the intervention</li><li>▪ How ongoing COVID-19 pandemic affects the uptake of the intervention by the target participants</li></ul> |

| <b>Supplementary Table 3: Programme's activity monitoring and course-correction indicators</b> |                                                                                                                                                                                                                                                                                                                                                                                         |                                                                                                                                                                                                                                                                                                       |                                                                                                                                                                                                                                                        |                                                                                                                                                                                                                                                      |                                                             |
|------------------------------------------------------------------------------------------------|-----------------------------------------------------------------------------------------------------------------------------------------------------------------------------------------------------------------------------------------------------------------------------------------------------------------------------------------------------------------------------------------|-------------------------------------------------------------------------------------------------------------------------------------------------------------------------------------------------------------------------------------------------------------------------------------------------------|--------------------------------------------------------------------------------------------------------------------------------------------------------------------------------------------------------------------------------------------------------|------------------------------------------------------------------------------------------------------------------------------------------------------------------------------------------------------------------------------------------------------|-------------------------------------------------------------|
|                                                                                                | <b>Inputs</b>                                                                                                                                                                                                                                                                                                                                                                           | <b>Outputs</b>                                                                                                                                                                                                                                                                                        | <b>Indicator</b>                                                                                                                                                                                                                                       | <b>Data Source/collection method</b>                                                                                                                                                                                                                 | <b>Data collection frequency</b>                            |
| <b>Product development and supply related activities</b>                                       | <ul style="list-style-type: none"> <li>▪ Development of a strategy to promote MMS</li> <li>▪ Adequate funding secured</li> <li>▪ Identification of key stakeholders and development of partnership</li> <li>▪ Adequate and timely supply of raw materials for product development</li> <li>▪ Supply chain identified and finalized</li> </ul>                                           | <ul style="list-style-type: none"> <li>▪ Government-approved product along with promotional activities</li> <li>▪ Well-developed program impact pathway available</li> <li>▪ Stakeholders are regularly updated regarding program progress</li> </ul>                                                 |                                                                                                                                                                                                                                                        | Key in-depth interview with SMC/GAIN<br>KII with the Government's key health and nutrition personnel (IPHN, DGDA, etc.)                                                                                                                              | Once                                                        |
| <b>MMS Delivery related activities</b>                                                         | <ul style="list-style-type: none"> <li>▪ Identification of different tiers of service providers</li> <li>▪ Selection and finalization of areas that will receive product considering priority</li> <li>▪ Support to upgrade infrastructure (if needed)</li> <li>▪ Identification of other pharmacies/service providers as the leverage point to promote MMS (Domino effect!)</li> </ul> | <ul style="list-style-type: none"> <li>▪ # of different tiers of service providers trained/reached</li> <li>▪ # of different tiers of service providers with adequate awareness regarding MMS</li> <li>▪ # of service providers with adequate logistics to provide the service/counselling</li> </ul> | <ul style="list-style-type: none"> <li>▪ # of BSP/GSP/PSP service providers trained</li> <li>▪ # of BSP/GSP/PSP service providers have regular stocks of MMS</li> <li>▪ # of BSP/GSP/PSP service providers express satisfaction selling MMS</li> </ul> | <ul style="list-style-type: none"> <li>▪ SMC digital dashboard</li> <li>▪ Training logbook of SMC</li> <li>▪ Exit interview with providers after training</li> <li>▪ Cross-sectional survey</li> <li>▪ Direct observation and stock check</li> </ul> | <ul style="list-style-type: none"> <li>▪ Ongoing</li> </ul> |

|                                          |                                                                                                                                                                                                                                                                                                                                                                   |                                                                                                                                                                                                                                                                                                                                                                                                                                                                                                                                                                                                         |                                                                                                                                                                                                                                                                                                                                                                                                                                                                                                                                                                                                                                                                                                                                                                                                                                                                                                                                                                                                                                                                         |                                                                                                                                                                                                                                                                          |                                                             |
|------------------------------------------|-------------------------------------------------------------------------------------------------------------------------------------------------------------------------------------------------------------------------------------------------------------------------------------------------------------------------------------------------------------------|---------------------------------------------------------------------------------------------------------------------------------------------------------------------------------------------------------------------------------------------------------------------------------------------------------------------------------------------------------------------------------------------------------------------------------------------------------------------------------------------------------------------------------------------------------------------------------------------------------|-------------------------------------------------------------------------------------------------------------------------------------------------------------------------------------------------------------------------------------------------------------------------------------------------------------------------------------------------------------------------------------------------------------------------------------------------------------------------------------------------------------------------------------------------------------------------------------------------------------------------------------------------------------------------------------------------------------------------------------------------------------------------------------------------------------------------------------------------------------------------------------------------------------------------------------------------------------------------------------------------------------------------------------------------------------------------|--------------------------------------------------------------------------------------------------------------------------------------------------------------------------------------------------------------------------------------------------------------------------|-------------------------------------------------------------|
| <p><b>Demand Creation Activities</b></p> | <ul style="list-style-type: none"> <li>▪ Business to Business (B2B) – training and seminar with network providers and launch several above-the-line (ATL) and below-the-line (BTL) promotional activities</li> <br/> <li>▪ Business to Consumers (B2C) – develop and air TVC/RDC and implement different ATL and BTL promotional campaigns/activities.</li> </ul> | <ul style="list-style-type: none"> <li>▪ # of training materials developed</li> <li>▪ # of promotional activities performed in the community</li> <li>▪ # of promotional activities performed through media</li> <li>▪ # of training workshop/seminar conducted</li> <li>▪ # of different tiers of service providers trained/reached</li> <li>▪ # of different tiers of service providers agreed to prescribe MMS</li> <li>▪ # target mothers reached through different promotional activities</li> <li>▪ # target mothers know about BSP/GSP/PSP</li> <li>▪ # target mothers know about MMS</li> </ul> | <ul style="list-style-type: none"> <li>▪ # of BSP/GSP/PSP service providers agree that training material was easy to understand and follow</li> <li>▪ # of target participants agree that any specific promotional activity was helpful</li> <li>▪ # of target participants agree that message of any specific promotional activity was clear</li> <li>▪ Perception of the target community regarding MMS</li> <li>▪ # of other pharmacies in the target area selling MMS (Domino effect!)</li> <li>▪ Crude coverage of the MMS in the target community</li> <li>▪ Quality-adjusted coverage of the target community (% of care seekers perceive the service as good quality)</li> <li>▪ # of target mothers come to the pharmacy</li> <li>▪ # of target family members come to the pharmacy</li> <li>▪ # of target mothers received tele-messages to pharmacy</li> <li>▪ # of target mothers who are repeated buyers</li> <li>▪ # of target mothers/family members willing to pay</li> <li>▪ # of target mothers experienced any difficulties to obtain MMS</li> </ul> | <ul style="list-style-type: none"> <li>▪ Cross-sectional survey</li> <li>▪ Exit interview with providers</li> <li>▪ Exit interview with participants after the promotional activity</li> <li>▪ Cross-sectional survey</li> <li>▪ FGD with target participants</li> </ul> | <ul style="list-style-type: none"> <li>▪ Ongoing</li> </ul> |
|------------------------------------------|-------------------------------------------------------------------------------------------------------------------------------------------------------------------------------------------------------------------------------------------------------------------------------------------------------------------------------------------------------------------|---------------------------------------------------------------------------------------------------------------------------------------------------------------------------------------------------------------------------------------------------------------------------------------------------------------------------------------------------------------------------------------------------------------------------------------------------------------------------------------------------------------------------------------------------------------------------------------------------------|-------------------------------------------------------------------------------------------------------------------------------------------------------------------------------------------------------------------------------------------------------------------------------------------------------------------------------------------------------------------------------------------------------------------------------------------------------------------------------------------------------------------------------------------------------------------------------------------------------------------------------------------------------------------------------------------------------------------------------------------------------------------------------------------------------------------------------------------------------------------------------------------------------------------------------------------------------------------------------------------------------------------------------------------------------------------------|--------------------------------------------------------------------------------------------------------------------------------------------------------------------------------------------------------------------------------------------------------------------------|-------------------------------------------------------------|
